# Supplementary material for: Patients’ and carers’ experiences of, and engagement with remote home monitoring services for COVID-19 patients: a rapid mixed-methods study
Source: bioRxiv or medRxiv preprint supplement (doi:10.1101/2021.12.17.21267968), 2021-12-17
Supplement: Supplementary file [file media-2.pdf]

Please quote this ID number if you would like to withdraw:

## **COVID CARE AT HOME: PATIENT AND CARER EXPERIENCE SURVEY**

### **Background information**

Please read the information sheet and this information before completing the survey.

Thank you for taking the time to look at our survey. The responses you provide will help us to understand more about the experiences of patients and carers (such as family members or friends who have provided care) who have received COVID care at home. The survey is part of a larger national study which is looking at the impact of COVID care at home.

The survey may take between 15 and 30 minutes to complete. The questions in the survey will ask you about the service that you (or your family member) received and your experience receiving and engaging with the service, and some questions about you (and your family member - if applicable). Please feel free to complete this survey with your family member/friend if you would like to. Please do not include any identifiable information (e.g. your name) in your responses.

After completing the survey, **please post your survey responses back to us (the research team) using the pre-paid envelope provided.**

The survey is part of a larger study which is funded by the UK National Institute for Health Research (NIHR).

This study has been reviewed and given favourable ethical opinion by the London-Bloomsbury Research Ethics Committee (REC reference: 21/HRA/0155).

The principal investigator for this study is Professor Naomi Fulop (n.fulop@ucl.ac.uk). If you have any questions about the survey, please contact Dr Holly Walton by email: [holly.walton@ucl.ac.uk](mailto:holly.walton@ucl.ac.uk) or telephone: 020 3108 3068.

#### **Important information about your data**

By completing this questionnaire, you are giving your consent for the information you have provided to be used by researchers at University College London, University of Birmingham and RAND Europe for this study.

The information obtained from surveys will be stored securely and managed in accordance with the UK Data Protection Act (2018) and General Data Protection Regulation (GDPR) 2018 and in accordance with the University College London, RAND Europe (a research consultancy company), Nuffield Trust and University of Birmingham's policies for data storage and management. Your personal data will be handled securely and anonymised after analysis and before publication.

You can withdraw your data up until 14 days after the date that you complete the survey. You can withdraw from the survey at any time during completion by exiting the survey. You will not be identifiable and all of your responses will remain anonymous.

For more information about the survey, please read the Participant information sheet (date: 10/02/2021 version 1.2)

Thank you so much for taking time to read this information.

If you would like to complete this survey, please tick all of the statements on Page 2 ('Section A. Consent to take part') and continue to complete the survey.

## Section A. Consent to take part

By ticking each box below and returning the survey to the research team, you are providing consent to take part in this survey. **Please tick all boxes if you would like to take part (1-6):**

|                                                                                                                                                                                                                                      | Please tick:             |
|--------------------------------------------------------------------------------------------------------------------------------------------------------------------------------------------------------------------------------------|--------------------------|
| 1. I have read the information provided for this study (information sheet dated 10/02/2021, version 1.2). I have had the opportunity to consider the information, ask questions and have had these answered satisfactorily.          | <input type="checkbox"/> |
| 2. I understand that my participation in this survey is voluntary and that I am free to withdraw up to 14 days after completing the survey. I understand if I withdraw, the data I have provided up until that time will be deleted. | <input type="checkbox"/> |
| 3. I understand that all personal information will be used for purposes explained to me, will remain confidential and that all efforts will be made to ensure I cannot be identified.                                                | <input type="checkbox"/> |
| 4. I understand that any identifiable data will be stored securely and will not be shared with anyone outside of the research team.                                                                                                  | <input type="checkbox"/> |
| 5. I give permission for the identifiable data I provide to be archived at University College London for up to three years after the end of the project. The anonymised data will be archived for up to 20 years.                    | <input type="checkbox"/> |
| 6. I agree to take part in this survey.                                                                                                                                                                                              | <input type="checkbox"/> |

If you have ticked boxes 1-6 above, please proceed to Section B.

## Section B. Type of respondent

1. Are you the patient who received COVID care at home or a carer (such as a family member or friend?) (please tick)

- Patient or service user
- Carer (e.g. family member or friend of someone who has received COVID care at home)

## Section C. Your experience of COVID care at home

Please answer the below survey questions about your experience of COVID care at home. The first questions relate to the service you received from COVID care at home.

*\*Note for carers completing this survey: If you are answering this survey as a carer, please respond to the questions in this section on behalf of your family member/friend who received COVID care at home (i.e. 'you' refers to you and your family member/friend).*

2. How were you referred to the COVID care at home service? (please tick)

- By a community healthcare professional (e.g. GP or community clinics)
- By the hospital (after attending the emergency department)
- By the hospital (after being discharged as an inpatient)
- Other (please specify):
- Not sure

- |                                                                                                                                                                                       | Yes                      | No                       | Not<br>sure              |
|---------------------------------------------------------------------------------------------------------------------------------------------------------------------------------------|--------------------------|--------------------------|--------------------------|
| <b>3. Did you receive an oximeter?</b> (please tick) ( <i>*An oximeter is a small machine that is placed on your finger. Oximeters are used to measure your blood oxygen levels</i> ) | <input type="checkbox"/> | <input type="checkbox"/> | <input type="checkbox"/> |
| <b>4. Were you given information on how to use the oximeter?</b> (please tick)                                                                                                        | <input type="checkbox"/> | <input type="checkbox"/> | <input type="checkbox"/> |
| <b>5. Were you given information on how to take and record your readings?</b> (please tick) ( <i>*Readings include oxygen saturation levels, temperature or heart rate</i> )          | <input type="checkbox"/> | <input type="checkbox"/> | <input type="checkbox"/> |
| <b>6. Were you given information about what to do if your oxygen levels dropped below the recommended levels?</b> (please tick)                                                       | <input type="checkbox"/> | <input type="checkbox"/> | <input type="checkbox"/> |
| <b>7. How was the information provided to you?</b> (please tick)                                                                                                                      |                          |                          |                          |
| <input type="checkbox"/> Written information                                                                                                                                          |                          |                          |                          |
| <input type="checkbox"/> Over the telephone                                                                                                                                           |                          |                          |                          |
| <input type="checkbox"/> Online information (e.g. video)                                                                                                                              |                          |                          |                          |
| <input type="checkbox"/> Other (please specify):                                                                                                                                      |                          |                          |                          |
|                                                                                                                                                                                       |                          |                          |                          |
| <input type="checkbox"/> Not applicable                                                                                                                                               |                          |                          |                          |

**8. How did you find understanding the information about COVID Care at home that you were provided with?** (please circle one response)

|           |      |         |           |                |                |
|-----------|------|---------|-----------|----------------|----------------|
| Very easy | Easy | Neutral | Difficult | Very difficult | Not applicable |
|-----------|------|---------|-----------|----------------|----------------|

**9. How helpful did you find the information on how to use the oximeter?** (please circle one response)

|              |         |         |                  |                    |                |
|--------------|---------|---------|------------------|--------------------|----------------|
| Very helpful | Helpful | Neutral | Not very helpful | Not at all helpful | Not applicable |
|--------------|---------|---------|------------------|--------------------|----------------|

**10. Did you have anyone (such as a family member or friend) who could help you to use the oximeter if needed? (please tick)**

|  |                          |                          |                          |
|--|--------------------------|--------------------------|--------------------------|
|  | <b>Yes</b>               | <b>No</b>                | <b>Not applicable</b>    |
|  | <input type="checkbox"/> | <input type="checkbox"/> | <input type="checkbox"/> |

**11. How were you asked to record your symptoms and outcomes (please select all that apply)**

|  |                          |                          |
|--|--------------------------|--------------------------|
|  | <b>Paper diary</b>       | <b>Digital app</b>       |
|  | <input type="checkbox"/> | <input type="checkbox"/> |

**12. Were you given the choice between using a digital app or a paper diary? (please tick)**

|  |                          |                          |
|--|--------------------------|--------------------------|
|  | <b>Yes</b>               | <b>No</b>                |
|  | <input type="checkbox"/> | <input type="checkbox"/> |

**13. Did you use the same method of recording your symptoms and outcomes throughout? (please tick)**

|  |                          |                          |
|--|--------------------------|--------------------------|
|  | <input type="checkbox"/> | <input type="checkbox"/> |
|--|--------------------------|--------------------------|

**14. Were you happy to record using a paper diary? (please tick. If you didn't use a paper diary, please choose not applicable)**

|  |                          |                          |                          |
|--|--------------------------|--------------------------|--------------------------|
|  | <b>Yes</b>               | <b>No</b>                | <b>Not applicable</b>    |
|  | <input type="checkbox"/> | <input type="checkbox"/> | <input type="checkbox"/> |

**15. How did you find using the paper diary? (please circle one response. If you didn't use a paper diary, please choose not applicable)**

|           |      |         |           |                |                |
|-----------|------|---------|-----------|----------------|----------------|
| Very easy | Easy | Neutral | Difficult | Very difficult | Not applicable |
|-----------|------|---------|-----------|----------------|----------------|

**16. Did you have access to a smartphone (or other device) to use the digital app?**  Yes  No  Not applicable  
*(please tick. If you didn't use an app please choose not applicable)*

**17. Were you happy to record using a digital app?**  Yes  No  Not applicable  
*(please tick. If you didn't use an app please choose not applicable)*

**18. How did you find using the digital app?** *(please circle one response. If you didn't use an app please choose not applicable)*

|           |      |         |           |                |                |
|-----------|------|---------|-----------|----------------|----------------|
| Very easy | Easy | Neutral | Difficult | Very difficult | Not applicable |
|-----------|------|---------|-----------|----------------|----------------|

**19. Did you have anyone to support you with taking and recording readings, if needed?**  Yes  No  Not applicable  
*(please tick)*

**20. Did you receive any medications as part of the COVID care at home service?** *(this question may only be applicable for those who have been discharged from hospital)*  Yes  No  Not sure  Not applicable

**21. Were you given oxygen as part of the COVID care at home service?** *(this question may only be applicable for those who have been discharged from hospital)*  Yes  No  Not sure  Not applicable

**22. On average, how often did you (or a family member/friend) speak to a member of the COVID care at home team while receiving the service? (please circle one response)**

|                     |            |                      |             |                       |            |
|---------------------|------------|----------------------|-------------|-----------------------|------------|
| Several times a day | Once a day | Several times a week | Once a week | Less than once a week | Not at all |
|---------------------|------------|----------------------|-------------|-----------------------|------------|

**23. How would you rate your contact with the COVID care at home team? (please circle one response)**

|           |      |         |      |           |                |
|-----------|------|---------|------|-----------|----------------|
| Excellent | Good | Neutral | Poor | Very poor | Not applicable |
|-----------|------|---------|------|-----------|----------------|

**24. What activities were you asked to do as part of your COVID care at home? (Please select all that apply)**

- |                                                          |                                                                                                           |
|----------------------------------------------------------|-----------------------------------------------------------------------------------------------------------|
| <input type="checkbox"/> Take readings using an oximeter | <input type="checkbox"/> Record readings in a digital app                                                 |
| <input type="checkbox"/> Fill in a diary                 | <input type="checkbox"/> Check over your readings for any issues                                          |
| <input type="checkbox"/> Provide readings over the phone | <input type="checkbox"/> Seek further help due to a reading being lower than recommended threshold        |
| <input type="checkbox"/> Provide readings via text       | <input type="checkbox"/> Other (please specify): <input style="width: 150px; height: 20px;" type="text"/> |
| <input type="checkbox"/> Provide readings via email      |                                                                                                           |

**25. Please rate your experience of receiving COVID care at home (please circle one option)**

|           |      |         |      |           |                |
|-----------|------|---------|------|-----------|----------------|
| Excellent | Good | Neutral | Poor | Very poor | Not applicable |
|-----------|------|---------|------|-----------|----------------|

**26. How reassured were you by receiving COVID care at home? (please circle one option)**

|                |           |         |                    |                      |                |
|----------------|-----------|---------|--------------------|----------------------|----------------|
| Very reassured | Reassured | Neutral | Not very reassured | Not at all reassured | Not applicable |
|----------------|-----------|---------|--------------------|----------------------|----------------|

**27. Thinking about your COVID symptoms, how helpful did you find receiving COVID care at home? (please circle one option)**

|              |         |         |                  |                    |                |
|--------------|---------|---------|------------------|--------------------|----------------|
| Very helpful | Helpful | Neutral | Not very helpful | Not at all helpful | Not applicable |
|--------------|---------|---------|------------------|--------------------|----------------|

**28. Would you recommend COVID care at home to your friends and family (if in a similar situation) (please tick)**

**Yes**       **No**       **Not sure**

**How have you found doing the following in practice? (please circle one option for each question)**

**29. Using the oximeter**

|           |      |         |           |                |                |
|-----------|------|---------|-----------|----------------|----------------|
| Very easy | Easy | Neutral | Difficult | Very difficult | Not applicable |
|-----------|------|---------|-----------|----------------|----------------|

**30. Recording your readings using the app or diary**

|           |      |         |           |                |                |
|-----------|------|---------|-----------|----------------|----------------|
| Very easy | Easy | Neutral | Difficult | Very difficult | Not applicable |
|-----------|------|---------|-----------|----------------|----------------|

**31. Providing readings to the service**

|           |      |         |           |                |                |
|-----------|------|---------|-----------|----------------|----------------|
| Very easy | Easy | Neutral | Difficult | Very difficult | Not applicable |
|-----------|------|---------|-----------|----------------|----------------|

**32. Seeking further help if have concerns about health (escalating care if necessary)**

|           |      |         |           |                |                |
|-----------|------|---------|-----------|----------------|----------------|
| Very easy | Easy | Neutral | Difficult | Very difficult | Not applicable |
|-----------|------|---------|-----------|----------------|----------------|

**33. Contacting a healthcare professional (if needed)**

|           |      |         |           |                |                |
|-----------|------|---------|-----------|----------------|----------------|
| Very easy | Easy | Neutral | Difficult | Very difficult | Not applicable |
|-----------|------|---------|-----------|----------------|----------------|

**34. Returning the oximeter following discharge**

|           |      |         |           |                |                |
|-----------|------|---------|-----------|----------------|----------------|
| Very easy | Easy | Neutral | Difficult | Very difficult | Not applicable |
|-----------|------|---------|-----------|----------------|----------------|

**35. Did you understand what would happen after being discharged from COVID care at home? (please tick)**

**Yes**      **No**      **Not sure**

          

**36. Were you asked to return the oximeter once discharged from COVID care at home? (please tick)**



**37. Did you experience any problems with any of the following?** *(Please select all that apply)*

- Using the oximeter
- Recording your readings in the app or diary
- Providing readings to the service
- Seeking further help if you had concerns about your health
- Contacting healthcare professionals when needed
- Returning the oximeter following discharge
- Other (please specify):
- I did not experience any problems

|                                                                                                                 | Yes                      | No                       | Not sure                 | Not applicable           |
|-----------------------------------------------------------------------------------------------------------------|--------------------------|--------------------------|--------------------------|--------------------------|
| <b>38. Did you discuss these problems with a member of the COVID care at home team?</b><br><i>(please tick)</i> | <input type="checkbox"/> | <input type="checkbox"/> | <input type="checkbox"/> | <input type="checkbox"/> |

|                                                                                     | Yes                      | No                       | Not sure                 | Not applicable           |
|-------------------------------------------------------------------------------------|--------------------------|--------------------------|--------------------------|--------------------------|
| <b>39. Was this problem (or were these problems) resolved?</b> <i>(please tick)</i> | <input type="checkbox"/> | <input type="checkbox"/> | <input type="checkbox"/> | <input type="checkbox"/> |

**40. What helped or encouraged you to use COVID care at home? (Please select all that apply)**

- |                                                                                                         |                                                                                                          |
|---------------------------------------------------------------------------------------------------------|----------------------------------------------------------------------------------------------------------|
| <input type="checkbox"/> Knowing why the service is important (e.g. for patients and/or NHS)            | <input type="checkbox"/> Wanting to do it                                                                |
| <input type="checkbox"/> Knowing what to do (e.g. how to use the oximeter, how to record readings, etc) | <input type="checkbox"/> Remembering to do it                                                            |
| <input type="checkbox"/> Own health (e.g. other health conditions)                                      | <input type="checkbox"/> Positive views of the service (e.g. liking it/trust)                            |
| <input type="checkbox"/> Having sufficient time                                                         | <input type="checkbox"/> Other (please specify) <input style="width: 200px; height: 20px;" type="text"/> |
| <input type="checkbox"/> Support from family or friends to use the equipment                            | <input type="checkbox"/> None of the above                                                               |
| <input type="checkbox"/> Support from healthcare professionals                                          |                                                                                                          |

**41. Was there anything that made it difficult for you to use COVID care at home? (Please select all that apply)**

- |                                                                                                             |                                                                                                           |
|-------------------------------------------------------------------------------------------------------------|-----------------------------------------------------------------------------------------------------------|
| <input type="checkbox"/> Not knowing why the service is important                                           | <input type="checkbox"/> Forgetting to do it                                                              |
| <input type="checkbox"/> Not knowing what to do (e.g. how to use the oximeter, how to record readings, etc) | <input type="checkbox"/> Not wanting to do it                                                             |
| <input type="checkbox"/> Own health (e.g. other health conditions)                                          | <input type="checkbox"/> Negative views towards the service (e.g. disliking it)                           |
| <input type="checkbox"/> Not having time                                                                    | <input type="checkbox"/> Concerns about being monitored or data use                                       |
| <input type="checkbox"/> Not having the right equipment                                                     | <input type="checkbox"/> Other (please specify): <input style="width: 200px; height: 20px;" type="text"/> |
| <input type="checkbox"/> Lack of support from family or friends                                             | <input type="checkbox"/> None of the above                                                                |
| <input type="checkbox"/> Lack of support from healthcare professionals                                      |                                                                                                           |

**42. What could have been changed to make it easier for you to engage with COVID care at home?** *(Please describe in the box below, or leave blank if not applicable)*

**43. Which of the following scenarios best describes your experience while receiving COVID care at home?** *(Please tick all that apply)*

- Stayed at home the whole time
- Asked to go to the emergency department
- Admitted to hospital

**44. Is there anything else you'd like to tell us about your experience of receiving COVID care at home?** *(Please describe in the box below, or leave blank if not applicable)*

## Section D. About you

Finally, we would like to ask you some questions about yourself. If you are completing this survey as a carer, we would also like to ask you some questions about your family member or friend (Section E).

**45. What is your gender?** *(please tick one option)*

Male

Other (please specify)

Female

Prefer not to  
 say

**46. How old are you? (please circle one option)**

|                    |                    |                    |                    |                    |                    |                    |                    |                    |                    |                    |                    |                    |              |                         |
|--------------------|--------------------|--------------------|--------------------|--------------------|--------------------|--------------------|--------------------|--------------------|--------------------|--------------------|--------------------|--------------------|--------------|-------------------------|
| 18-<br>24<br>years | 25-<br>29<br>years | 30-<br>34<br>years | 35-<br>39<br>years | 40-<br>44<br>years | 45-<br>49<br>years | 50-<br>54<br>years | 55-<br>59<br>years | 60-<br>64<br>years | 65-<br>69<br>years | 70-<br>74<br>years | 75-<br>79<br>years | 80-<br>84<br>years | 85+<br>years | Prefer<br>not to<br>say |
|--------------------|--------------------|--------------------|--------------------|--------------------|--------------------|--------------------|--------------------|--------------------|--------------------|--------------------|--------------------|--------------------|--------------|-------------------------|

**47. How many people do you live/co-habit with? (please circle one option)**

|   |   |   |   |   |   |   |   |   |   |               |                      |
|---|---|---|---|---|---|---|---|---|---|---------------|----------------------|
| 0 | 1 | 2 | 3 | 4 | 5 | 6 | 7 | 8 | 9 | 10 or<br>more | Prefer not<br>to say |
|---|---|---|---|---|---|---|---|---|---|---------------|----------------------|

**48. Which of these best describes your living arrangement?**

I own my home outright

I rent privately

I own my home with a mortgage

Other (e.g. living with friends or  
 family), please specify

I rent from local  
 authority/housing association

Prefer not to say

**49. What is your ethnic group?** (Choose one option that best describes your ethnic group or background)

|                                                                                                                                                                                                                                                                                                                   |                                                                                                                                                                                                                                                                                         |                                                                                                                                                    |
|-------------------------------------------------------------------------------------------------------------------------------------------------------------------------------------------------------------------------------------------------------------------------------------------------------------------|-----------------------------------------------------------------------------------------------------------------------------------------------------------------------------------------------------------------------------------------------------------------------------------------|----------------------------------------------------------------------------------------------------------------------------------------------------|
| <p><b>White</b></p> <p><input type="checkbox"/> English/Welsh/Scottish/<br/>Northern Irish/British</p> <p><input type="checkbox"/> Irish</p> <p><input type="checkbox"/> Gypsy or Irish Traveller</p> <p><input type="checkbox"/> Any other white<br/>background, please describe:</p>                            | <p><b>Asian/Asian British</b></p> <p><input type="checkbox"/> Indian</p> <p><input type="checkbox"/> Pakistani</p> <p><input type="checkbox"/> Bangladeshi</p> <p><input type="checkbox"/> Chinese</p> <p><input type="checkbox"/> Any other Asian<br/>background, please describe:</p> | <p><b>Other ethnic group</b></p> <p><input type="checkbox"/> Arab</p> <p><input type="checkbox"/> Any other ethnic<br/>group, please describe:</p> |
| <p><b>Mixed/Multiple ethnic groups</b></p> <p><input type="checkbox"/> White and Black Caribbean</p> <p><input type="checkbox"/> White and Black African</p> <p><input type="checkbox"/> White and Asian</p> <p><input type="checkbox"/> Any other Mixed/Multiple<br/>ethnic background, please<br/>describe:</p> | <p><b>Black/African/Caribbean/Black<br/>British</b></p> <p><input type="checkbox"/> African</p> <p><input type="checkbox"/> Caribbean</p> <p><input type="checkbox"/> Any other<br/>Black/African/Caribbean<br/>background, please describe:</p>                                        | <p><input type="checkbox"/> Prefer not to say</p>                                                                                                  |

**50. At what age did you complete your continuous full time education?** (e.g. school, college, further education) Please write your age in the box below:

years

Prefer not to say

**51. Which of these best describes your highest educational qualification?** (Please tick one option)

No formal qualification

Degree level or higher

GCSE/CSE/O level or equivalent

Other, please specify

\_\_\_\_\_

- A level/AS level or equivalent       Prefer not to say

**52. Which of these best describes your current work situation? (Please select all that apply)**

- |                                                      |                                                                        |
|------------------------------------------------------|------------------------------------------------------------------------|
| <input type="checkbox"/> Working full time           | <input type="checkbox"/> Retired                                       |
| <input type="checkbox"/> Working part time           | <input type="checkbox"/> Furloughed under covid-19                     |
| <input type="checkbox"/> Self-employed               | <input type="checkbox"/> Full time carer (of dependent child or adult) |
| <input type="checkbox"/> Student in higher education | <input type="checkbox"/> Not in work due to poor health or disability  |
| <input type="checkbox"/> Unemployed                  | <input type="checkbox"/> Other, please specify<br>_____                |
| <input type="checkbox"/> Homemaker                   | <input type="checkbox"/> Prefer not to say                             |

**53. This question is about your sexual orientation. Do you identify as:**

- |                                                |                                                                      |
|------------------------------------------------|----------------------------------------------------------------------|
| <input type="checkbox"/> Straight/heterosexual | <input type="checkbox"/> Other (please specify) <input type="text"/> |
| <input type="checkbox"/> Gay or lesbian        | <input type="checkbox"/> Prefer not to say                           |
| <input type="checkbox"/> Bisexual              |                                                                      |

**54. Is English your first language?**

- Yes
- No, please specify \_\_\_\_\_
- Prefer not to say

**55. Prior to your current illness, were your day-to-day activities limited because of a health problem or disability which has lasted, or is expected to last, at least 12 months?**

- |                                                |                                            |
|------------------------------------------------|--------------------------------------------|
| <input type="checkbox"/> Yes limited a lot     | <input type="checkbox"/> Prefer not to say |
| <input type="checkbox"/> Yes limited a little  | <input type="checkbox"/> Not sure          |
| <input type="checkbox"/> No not limited at all | <input type="checkbox"/> Not applicable    |

**56. What is your postcode?** *(Please write in the box below)*

|  |  |  |  |  |  |  |
|--|--|--|--|--|--|--|
|  |  |  |  |  |  |  |
|--|--|--|--|--|--|--|

- Prefer not to say

**If you are a family member/friend, please continue to complete Section E (page 16). If you are a patient, please read the summary information below.**

## Summary

Thank you so much for completing our survey about your experiences of receiving COVID care at home. Your responses will help us to evaluate the COVID care at home service.

Please post your survey responses back to us (the research team) using the pre-paid envelope provided.

Please contact Dr Holly Walton ([holly.walton@ucl.ac.uk](mailto:holly.walton@ucl.ac.uk) | Tel: 020 3108 3068) if you have any questions about this survey.

## Section E. About your family member/friend [carers only]

If you are completing this survey as a carer, we would also like to ask you some questions about your family member or friend who received COVID care at home. Please complete this section.

If you are a patient, please skip this section and go to the summary section.

### 57. What is your relationship with the patient? (Please tick one option)

- |                                                 |                                                         |
|-------------------------------------------------|---------------------------------------------------------|
| <input type="checkbox"/> Spouse or partner      | <input type="checkbox"/> Sibling                        |
| <input type="checkbox"/> Son or daughter        | <input type="checkbox"/> Friend                         |
| <input type="checkbox"/> Son or daughter in law | <input type="checkbox"/> Other, please specify<br>_____ |
| <input type="checkbox"/> Parent                 |                                                         |

### 58. How have you supported your family member or friend while they have had COVID? (Please provide details in the box below)

### 59. What is the gender of your family member/friend who received COVID care at home?

- |                                 |                                                 |                                                                          |
|---------------------------------|-------------------------------------------------|--------------------------------------------------------------------------|
| <input type="checkbox"/> Male   | <input type="checkbox"/> Other (please specify) | <div style="border: 1px solid black; width: 150px; height: 30px;"></div> |
| <input type="checkbox"/> Female | <input type="checkbox"/> Prefer not to say      |                                                                          |

### 60. How old is your family member/friend?

|             |             |             |             |             |             |             |             |             |             |             |             |             |           |                   |
|-------------|-------------|-------------|-------------|-------------|-------------|-------------|-------------|-------------|-------------|-------------|-------------|-------------|-----------|-------------------|
| 18-24 years | 25-29 years | 30-34 years | 35-39 years | 40-44 years | 45-49 years | 50-54 years | 55-59 years | 60-64 years | 65-69 years | 70-74 years | 75-79 years | 80-84 years | 85+ years | Prefer not to say |
|-------------|-------------|-------------|-------------|-------------|-------------|-------------|-------------|-------------|-------------|-------------|-------------|-------------|-----------|-------------------|



**61. What is the ethnic group of your family member/friend?** *(Choose one option that best describes your ethnic group or background)*

|                                                                                                                                                                                                                                                                                                                   |                                                                                                                                                                                                                                                                                         |                                                                                                                                                    |
|-------------------------------------------------------------------------------------------------------------------------------------------------------------------------------------------------------------------------------------------------------------------------------------------------------------------|-----------------------------------------------------------------------------------------------------------------------------------------------------------------------------------------------------------------------------------------------------------------------------------------|----------------------------------------------------------------------------------------------------------------------------------------------------|
| <p><b>White</b></p> <p><input type="checkbox"/> English/Welsh/Scottish/<br/>Northern Irish/British</p> <p><input type="checkbox"/> Irish</p> <p><input type="checkbox"/> Gypsy or Irish Traveller</p> <p><input type="checkbox"/> Any other white<br/>background, please describe:</p>                            | <p><b>Asian/Asian British</b></p> <p><input type="checkbox"/> Indian</p> <p><input type="checkbox"/> Pakistani</p> <p><input type="checkbox"/> Bangladeshi</p> <p><input type="checkbox"/> Chinese</p> <p><input type="checkbox"/> Any other Asian<br/>background, please describe:</p> | <p><b>Other ethnic group</b></p> <p><input type="checkbox"/> Arab</p> <p><input type="checkbox"/> Any other ethnic<br/>group, please describe:</p> |
| <p><b>Mixed/Multiple ethnic groups</b></p> <p><input type="checkbox"/> White and Black Caribbean</p> <p><input type="checkbox"/> White and Black African</p> <p><input type="checkbox"/> White and Asian</p> <p><input type="checkbox"/> Any other Mixed/Multiple<br/>ethnic background, please<br/>describe:</p> | <p><b>Black/African/Caribbean/Black<br/>British</b></p> <p><input type="checkbox"/> African</p> <p><input type="checkbox"/> Caribbean</p> <p><input type="checkbox"/> Any other<br/>Black/African/Caribbean<br/>background, please describe:</p>                                        | <p><input type="checkbox"/> <b>Prefer not to say</b></p>                                                                                           |

**62. At what age did your family member/friend complete their continuous full time education?** *(e.g. school, college, further education) Please write your age in the box below:*

\_\_\_\_\_ years

- Prefer not to say
- Not sure

**63. Which of these best describes your family member/friend's highest educational qualification?** *(Please tick one option)*

- |                                                         |                                                         |
|---------------------------------------------------------|---------------------------------------------------------|
| <input type="checkbox"/> No formal qualification        | <input type="checkbox"/> Degree level or higher         |
| <input type="checkbox"/> GCSE/CSE/O level or equivalent | <input type="checkbox"/> Other, please specify<br>_____ |
| <input type="checkbox"/> A level/AS level or equivalent | <input type="checkbox"/> Prefer not to say              |

**64. Which of these best describes your family member/friend's current work situation? (Please select all that apply)**

- |                                                      |                                                                        |
|------------------------------------------------------|------------------------------------------------------------------------|
| <input type="checkbox"/> Working full time           | <input type="checkbox"/> Retired                                       |
| <input type="checkbox"/> Working part time           | <input type="checkbox"/> Furloughed under covid-19                     |
| <input type="checkbox"/> Self-employed               | <input type="checkbox"/> Full time carer (of dependent child or adult) |
| <input type="checkbox"/> Student in higher education | <input type="checkbox"/> Not in work due to poor health or disability  |
| <input type="checkbox"/> Unemployed                  | <input type="checkbox"/> Other, please specify<br>_____                |
| <input type="checkbox"/> Homemaker                   | <input type="checkbox"/> Prefer not to say                             |

**65. This question is about your family member/friend's sexual orientation. Do they identify as:**

- |                                                |                                                 |                      |
|------------------------------------------------|-------------------------------------------------|----------------------|
| <input type="checkbox"/> Straight/heterosexual | <input type="checkbox"/> Other (please specify) | <input type="text"/> |
| <input type="checkbox"/> Gay or lesbian        | <input type="checkbox"/> Prefer not to say      |                      |
| <input type="checkbox"/> Bisexual              |                                                 |                      |

**66. Is English your family member/friend's first language?**

- Yes
- No, please specify \_\_\_\_\_
- Prefer not to say

**67. Prior to your family member/friend's current illness, were their day-to-day activities limited because of a health problem or disability which has lasted, or is expected to last, at least 12 months?**

- Yes limited a lot                       Prefer not to say  
 Yes limited a little                       Not sure  
 No not limited at all

**68. What is your family member/friend's postcode?** *(Please write in the box below)*

|  |  |  |  |  |  |  |
|--|--|--|--|--|--|--|
|  |  |  |  |  |  |  |
|--|--|--|--|--|--|--|

- Prefer not to say  
 Not sure

## Summary

Thank you so much for completing our survey about your family member/friend's experiences of receiving COVID care at home. Your responses will help us to evaluate the COVID care at home service.

Please post your survey responses back to us (the research team) using the pre-paid envelope provided.

Please contact Dr Holly Walton ([holly.walton@ucl.ac.uk](mailto:holly.walton@ucl.ac.uk) | Tel: 020 3108 3068) if you have any questions about this survey.
